# Supplementary material for: Artificial intelligence-assisted cryoEM structure of Bfr2-Lcp5 complex observed in the yeast small subunit processome
Source: PubMed Central journal article supplement (PMC9160021; doi:10.1038/s42003-022-03500-y), 2022-06-01
Supplement: 42003_2022_3500_MOESM2_ESM.pdf [file 42003_2022_3500_MOESM2_ESM.pdf]

## Description of Additional Supplementary Files

**File name:** Supplementary Data 1

**Description:** List of Mass Spectrometry Identified Proteins from Isolated Dpih1-90S.
